# Supplementary material
Source: Springer Nature journal article supplement (https://www.springermedizin.de/resource/supplementary/12883_2013_960_MOESM1_ESM.pdf/9456520)

Changes in Barthel-Index (discharge - admission)

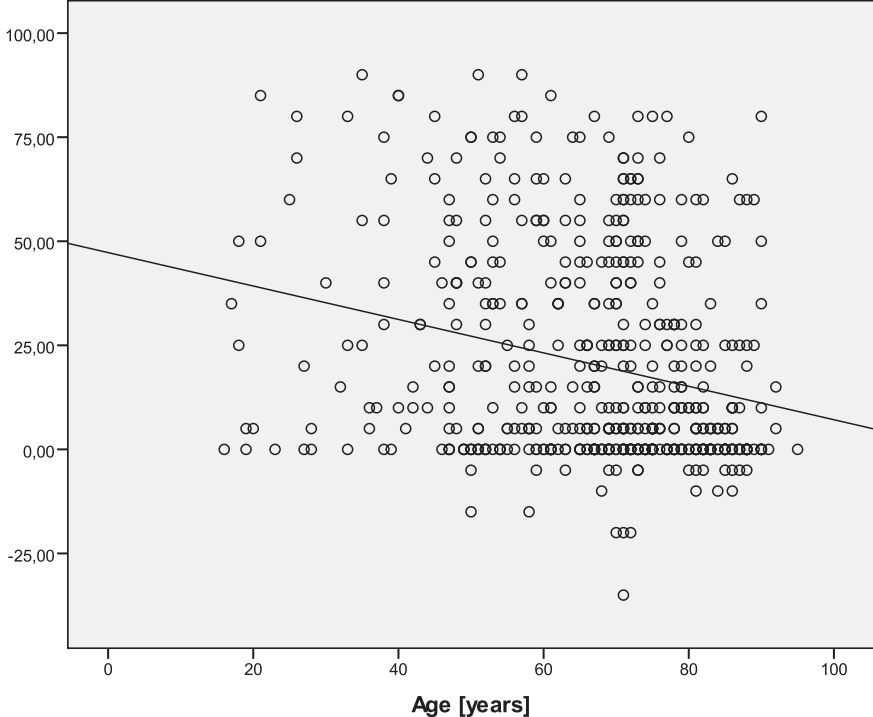

Supplement: MOESM1 [file 9456520]
